# Supplementary material
Source: PubMed Central journal article supplement (PMC4393352)
Supplement: NIHMS645459-supplement-1.pdf [file NIHMS645459-supplement-1.pdf]

## Supplementary Table 1: *EZH2* Co-Expression Gene Signature

Top 116 genes co-expressed with *EZH2* across 9 Oncomine studies

| Gene Symbol     | Description                                                                        |
|-----------------|------------------------------------------------------------------------------------|
| <b>ALS2CR4</b>  | amyotrophic lateral sclerosis 2 (juvenile) chromosome region, candidate 4          |
| <b>ATIC</b>     | 5-aminoimidazole-4-carboxamide ribonucleotide formyltransferase/IMP cyclohydrolase |
| <b>ATP2A2</b>   | ATPase, Ca <sup>++</sup> transporting, cardiac muscle, slow twitch 2               |
| <b>AURKA</b>    | aurora kinase A                                                                    |
| <b>BIRC5</b>    | baculoviral IAP repeat-containing 5                                                |
| <b>BOP1</b>     | block of proliferation 1                                                           |
| <b>BUB1</b>     | budding uninhibited by benzimidazoles 1 homolog (yeast)                            |
| <b>BUB1B</b>    | budding uninhibited by benzimidazoles 1 homolog beta (yeast)                       |
| <b>C13orf34</b> | chromosome 13 open reading frame 34                                                |
| <b>C1orf112</b> | chromosome 1 open reading frame 112                                                |
| <b>CCNA2</b>    | cyclin A2                                                                          |
| <b>CCNB1</b>    | cyclin B1                                                                          |
| <b>CCNB2</b>    | cyclin B2                                                                          |
| <b>CDC20</b>    | cell division cycle 20 homolog ( <i>S. cerevisiae</i> )                            |
| <b>CDC25A</b>   | cell division cycle 25 homolog A ( <i>S. pombe</i> )                               |
| <b>CDC6</b>     | cell division cycle 6 homolog ( <i>S. cerevisiae</i> )                             |
| <b>CDC7</b>     | cell division cycle 7 homolog ( <i>S. cerevisiae</i> )                             |
| <b>CDCA3</b>    | cell division cycle associated 3                                                   |
| <b>CDCA8</b>    | cell division cycle associated 8                                                   |
| <b>CDK1</b>     | cyclin-dependent kinase 1                                                          |
| <b>CDKN3</b>    | cyclin-dependent kinase inhibitor 3                                                |
| <b>CENPE</b>    | centromere protein E, 312kDa                                                       |
| <b>CENPF</b>    | centromere protein F, 350/400kDa (mitosin)                                         |
| <b>CENPM</b>    | centromere protein M                                                               |
| <b>CENPW</b>    | centromere protein W                                                               |
| <b>CHEK1</b>    | CHK1 checkpoint homolog ( <i>S. pombe</i> )                                        |
| <b>CKAP2</b>    | cytoskeleton associated protein 2                                                  |
| <b>CKS1B</b>    | CDC28 protein kinase regulatory subunit 1B                                         |
| <b>CKS2</b>     | CDC28 protein kinase regulatory subunit 2                                          |
| <b>CSE1L</b>    | CSE1 chromosome segregation 1-like (yeast)                                         |
| <b>CSTF1</b>    | cleavage stimulation factor, 3' pre-RNA, subunit 1, 50kDa                          |
| <b>CTPS</b>     | CTP synthase                                                                       |
| <b>DBF4</b>     | DBF4 homolog ( <i>S. cerevisiae</i> )                                              |
| <b>DBN1</b>     | drebrin 1                                                                          |
| <b>DEPDC1</b>   | DEP domain containing 1                                                            |
| <b>DLGAP5</b>   | discs, large ( <i>Drosophila</i> ) homolog-associated protein 5                    |
| <b>DTL</b>      | denticleless homolog ( <i>Drosophila</i> )                                         |
| <b>ECT2</b>     | Epithelial cell transforming sequence 2 oncogene                                   |
| <b>ESCO2</b>    | establishment of cohesion 1 homolog 2 ( <i>S. cerevisiae</i> )                     |

|                 |                                                                             |
|-----------------|-----------------------------------------------------------------------------|
| <b>ESPL1</b>    | extra spindle pole bodies homolog 1 ( <i>S. cerevisiae</i> )                |
| <b>EXO1</b>     | exonuclease 1                                                               |
| <b>EZH2</b>     | enhancer of zeste homolog 2 ( <i>Drosophila</i> )                           |
| <b>FANCI</b>    | Fanconi anemia, complementation group I                                     |
| <b>FBXO5</b>    | F-box protein 5                                                             |
| <b>FEN1</b>     | flap structure-specific endonuclease 1                                      |
| <b>FOXM1</b>    | forkhead box M1                                                             |
| <b>GINS1</b>    | GINS complex subunit 1 (Psf1 homolog)                                       |
| <b>GINS2</b>    | GINS complex subunit 2 (Psf2 homolog)                                       |
| <b>GMNN</b>     | geminin, DNA replication inhibitor                                          |
| <b>GOT1</b>     | glutamic-oxaloacetic transaminase 1, soluble (aspartate aminotransferase 1) |
| <b>GPD2</b>     | glycerol-3-phosphate dehydrogenase 2 (mitochondrial)                        |
| <b>H2AFX</b>    | H2A histone family, member X                                                |
| <b>H2AFZ</b>    | H2A histone family, member Z                                                |
| <b>HMGA1</b>    | high mobility group AT-hook 1                                               |
| <b>HMGB2</b>    | high-mobility group box 2                                                   |
| <b>HMMR</b>     | hyaluronan-mediated motility receptor (RHAMM)                               |
| <b>HN1</b>      | hematological and neurological expressed 1                                  |
| <b>KIAA0101</b> | KIAA0101                                                                    |
| <b>KIF11</b>    | kinesin family member 11                                                    |
| <b>KIF14</b>    | kinesin family member 14                                                    |
| <b>KIF15</b>    | kinesin family member 15                                                    |
| <b>KIF18A</b>   | kinesin family member 18A                                                   |
| <b>KIF18B</b>   | kinesin family member 18B                                                   |
| <b>KIF20A</b>   | kinesin family member 20A                                                   |
| <b>KIF20B</b>   | kinesin family member 20B                                                   |
| <b>KIF23</b>    | kinesin family member 23                                                    |
| <b>KIF2C</b>    | kinesin family member 2C                                                    |
| <b>KIFC1</b>    | kinesin family member C1                                                    |
| <b>KNTC1</b>    | kinetochore associated 1                                                    |
| <b>KPNA2</b>    | karyopherin alpha 2 (RAG cohort 1, importin alpha 1)                        |
| <b>LMNB1</b>    | lamin B1                                                                    |
| <b>LMNB2</b>    | lamin B2                                                                    |
| <b>MAD2L1</b>   | MAD2 mitotic arrest deficient-like 1 (yeast)                                |
| <b>MCM10</b>    | minichromosome maintenance complex component 10                             |
| <b>MCM7</b>     | minichromosome maintenance complex component 7                              |
| <b>MKI67</b>    | antigen identified by monoclonal antibody Ki-67                             |
| <b>MLF1IP</b>   | MLF1 interacting protein                                                    |
| <b>MTHFD2</b>   | methylenetetrahydrofolate dehydrogenase (NADP+ dependent) 2,                |
| <b>NCAPG</b>    | non-SMC condensin I complex, subunit G                                      |
| <b>NCAPG2</b>   | non-SMC condensin II complex, subunit G2                                    |
| <b>NCAPH</b>    | non-SMC condensin I complex, subunit H                                      |
| <b>NDC80</b>    | NDC80 homolog, kinetochore complex component ( <i>S. cerevisiae</i> )       |
| <b>NUP205</b>   | nucleoporin 205kDa                                                          |
| <b>OLA1</b>     | Obg-like ATPase 1                                                           |
| <b>PAICS</b>    | phosphoribosylaminoimidazole carboxylase                                    |

|                 |                                                                                |
|-----------------|--------------------------------------------------------------------------------|
| <b>PBK</b>      | PDZ binding kinase                                                             |
| <b>PCNA</b>     | proliferating cell nuclear antigen                                             |
| <b>PFN2</b>     | profilin 2                                                                     |
| <b>PLK4</b>     | polo-like kinase 4                                                             |
| <b>POLA1</b>    | polymerase (DNA directed), alpha 1, catalytic subunit                          |
| <b>POLE2</b>    | polymerase (DNA directed), epsilon 2 (p59 subunit)                             |
| <b>PPAT</b>     | Phosphoribosyl pyrophosphate amidotransferase                                  |
| <b>PRIM1</b>    | primase, DNA, polypeptide 1 (49kDa)                                            |
| <b>PSMD14</b>   | proteasome (prosome, macropain) 26S subunit, non-ATPase, 14                    |
| <b>PTTG1</b>    | pituitary tumor-transforming 1                                                 |
| <b>RFC4</b>     | replication factor C (activator 1) 4, 37kDa                                    |
| <b>SLC7A5</b>   | solute carrier family 7 (cationic amino acid transporter, y+ system), member 5 |
| <b>SMC2</b>     | structural maintenance of chromosomes 2                                        |
| <b>SMC4</b>     | structural maintenance of chromosomes 4                                        |
| <b>SPAG5</b>    | sperm associated antigen 5                                                     |
| <b>SRM</b>      | spermidine synthase                                                            |
| <b>STIL</b>     | SCL/TAL1 interrupting locus                                                    |
| <b>STMN1</b>    | stathmin 1                                                                     |
| <b>TACC3</b>    | transforming, acidic coiled-coil containing protein 3                          |
| <b>TFRC</b>     | Transferrin receptor (p90, CD71)                                               |
| <b>TMEM106C</b> | transmembrane protein 106C                                                     |
| <b>TOP2A</b>    | Topoisomerase (DNA) II alpha 170kDa                                            |
| <b>TOPBP1</b>   | topoisomerase (DNA) II binding protein 1                                       |
| <b>TPX2</b>     | TPX2, microtubule-associated, homolog (Xenopus laevis)                         |
| <b>TRIP13</b>   | thyroid hormone receptor interactor 13                                         |
| <b>TROAP</b>    | trophinin associated protein (tastin)                                          |
| <b>TYMS</b>     | thymidylate synthetase                                                         |
| <b>UBE2C</b>    | ubiquitin-conjugating enzyme E2C                                               |
| <b>UBE2S</b>    | ubiquitin-conjugating enzyme E2S                                               |
| <b>UNG</b>      | uracil-DNA glycosylase                                                         |
| <b>WDR12</b>    | WD repeat domain 12                                                            |

**Supplementary Table 2: Gene function enrichment analysis of *EZH2* co-expressed gene signature**

C1: number of genes in a cluster or list that have this annotation term

C2: number of annotated genes in this cluster or list

C3: number of all genes on array that have this annotation term

C4: number of all annotated genes on array

P-value: binomial approximated p-value for hypergeometric distribution

**\*\*\*Gene  
Ontology\*\*\***

| C1 | C2  | C3   | C4    | P-value  | Term Name                                                    |
|----|-----|------|-------|----------|--------------------------------------------------------------|
| 81 | 112 | 5956 | 12364 | 0        | protein binding                                              |
| 73 | 112 | 3967 | 12364 | 0        | nucleus                                                      |
| 58 | 112 | 3873 | 12364 | 0.000005 | cytoplasm                                                    |
| 49 | 112 | 439  | 12364 | 0        | cell cycle                                                   |
| 38 | 112 | 243  | 12364 | 0        | cell division                                                |
| 36 | 112 | 186  | 12364 | 0        | mitosis                                                      |
| 36 | 112 | 1621 | 12364 | 0        | nucleotide binding                                           |
| 35 | 112 | 1250 | 12364 | 0        | ATP binding                                                  |
| 30 | 112 | 436  | 12364 | 0        | nucleoplasm                                                  |
| 24 | 112 | 667  | 12364 | 0        | cytoskeleton                                                 |
| 20 | 112 | 144  | 12364 | 0        | DNA replication                                              |
| 18 | 112 | 294  | 12364 | 0        | cell proliferation                                           |
| 18 | 112 | 103  | 12364 | 0        | spindle                                                      |
| 16 | 112 | 203  | 12364 | 0        | microtubule                                                  |
| 15 | 112 | 224  | 12364 | 0        | DNA repair                                                   |
| 14 | 112 | 155  | 12364 | 0        | chromosome                                                   |
| 12 | 112 | 46   | 12364 | 0        | phosphoinositide-mediated signaling                          |
| 11 | 112 | 53   | 12364 | 0        | condensed chromosome kinetochore                             |
| 11 | 112 | 71   | 12364 | 0        | kinetochore                                                  |
| 11 | 112 | 54   | 12364 | 0        | microtubule motor activity                                   |
| 11 | 112 | 65   | 12364 | 0        | microtubule-based movement                                   |
| 11 | 112 | 109  | 12364 | 0        | motor activity                                               |
| 10 | 112 | 236  | 12364 | 0.000062 | response to DNA damage stimulus                              |
| 10 | 112 | 47   | 12364 | 0        | spindle pole                                                 |
| 8  | 112 | 59   | 12364 | 0        | anaphase-promoting complex-dependent proteasomal degradation |
| 8  | 112 | 41   | 12364 | 0        | chromosome segregation                                       |
| 7  | 112 | 47   | 12364 | 0        | chromosome, centromeric region                               |
| 7  | 112 | 135  | 12364 | 0.000247 | microtubule organizing center                                |
| 7  | 112 | 14   | 12364 | 0        | spindle organization                                         |
| 6  | 112 | 12   | 12364 | 0        | chromosome condensation                                      |

|                                                                                                                      |     |    |       |          |                                                         |
|----------------------------------------------------------------------------------------------------------------------|-----|----|-------|----------|---------------------------------------------------------|
| 6                                                                                                                    | 112 | 58 | 12364 | 0.000017 | negative regulation of mitotic ubiquitin-protein ligase |
| 6                                                                                                                    | 112 | 61 | 12364 | 0.000022 | positive regulation of mitotic ubiquitin-protein ligase |
| 6                                                                                                                    | 112 | 38 | 12364 | 0.000002 | regulation of cyclin-dependent protein kinase activity  |
| 5                                                                                                                    | 112 | 49 | 12364 | 0.000092 | microtubule cytoskeleton                                |
| 5                                                                                                                    | 112 | 14 | 12364 | 0        | mitotic sister chromatid segregation                    |
| 5                                                                                                                    | 112 | 25 | 12364 | 0.000004 | spindle microtubule                                     |
| 4                                                                                                                    | 112 | 19 | 12364 | 0.000003 | chromosome organization                                 |
| 4                                                                                                                    | 112 | 23 | 12364 | 0.000063 | condensed chromosome                                    |
| 4                                                                                                                    | 112 | 5  | 12364 | 0        | condensin complex                                       |
| 4                                                                                                                    | 112 | 36 | 12364 | 0.000347 | DNA metabolic process                                   |
| 4                                                                                                                    | 112 | 44 | 12364 | 0.000734 | G1/S transition of mitotic cell cycle                   |
| 4                                                                                                                    | 112 | 8  | 12364 | 0.000001 | M phase of mitotic cell cycle                           |
| 4                                                                                                                    | 112 | 19 | 12364 | 0.000003 | midbody                                                 |
| 4                                                                                                                    | 112 | 12 | 12364 | 0.000005 | mitotic cell cycle checkpoint                           |
| 4                                                                                                                    | 112 | 11 | 12364 | 0.000004 | mitotic cell cycle spindle assembly checkpoint          |
| 4                                                                                                                    | 112 | 12 | 12364 | 0.000005 | mitotic chromosome condensation                         |
| 4                                                                                                                    | 112 | 26 | 12364 | 0.000101 | nuclear chromosome                                      |
| 3                                                                                                                    | 112 | 6  | 12364 | 0.000025 | 'de novo' IMP biosynthetic process                      |
| 3                                                                                                                    | 112 | 20 | 12364 | 0.000846 | anaphase-promoting complex                              |
| 3                                                                                                                    | 112 | 14 | 12364 | 0.000302 | DNA unwinding involved in replication                   |
| 3                                                                                                                    | 112 | 20 | 12364 | 0.000846 | G2/M transition of mitotic cell cycle                   |
| 3                                                                                                                    | 112 | 13 | 12364 | 0.000243 | kinesin complex                                         |
| 3                                                                                                                    | 112 | 15 | 12364 | 0.000369 | male germ cell nucleus                                  |
| 3                                                                                                                    | 112 | 10 | 12364 | 0.000113 | mitotic cell cycle                                      |
| 3                                                                                                                    | 112 | 15 | 12364 | 0.000369 | mitotic spindle organization                            |
| 3                                                                                                                    | 112 | 17 | 12364 | 0.00053  | nucleotide-excision repair, DNA gap filling             |
| 3                                                                                                                    | 112 | 13 | 12364 | 0.000243 | oocyte maturation                                       |
| 3                                                                                                                    | 112 | 8  | 12364 | 0.000059 | outer kinetochore of condensed chromosome               |
| 3                                                                                                                    | 112 | 15 | 12364 | 0.000369 | purine nucleotide biosynthetic process                  |
| 3                                                                                                                    | 112 | 15 | 12364 | 0.000369 | regulation of mitosis                                   |
| 3                                                                                                                    | 112 | 11 | 12364 | 0.000149 | replication fork                                        |
| 2                                                                                                                    | 112 | 5  | 12364 | 0.000987 | lamin filament                                          |
| 2                                                                                                                    | 112 | 5  | 12364 | 0.000987 | purine base biosynthetic process                        |
| 2                                                                                                                    | 112 | 3  | 12364 | 0.00036  | regulation of chromosome segregation                    |
| 64 reported significant, 0 expected false positive<br>(209 terms assessed for enrichment at p-value threshold 0.001) |     |    |       |          |                                                         |

# Supplementary Table 3: Chou Talalay Combination Index Analysis

| H23 DZNep + Etoposide<br>CI Simulations |         |           |                           |                            |
|-----------------------------------------|---------|-----------|---------------------------|----------------------------|
| Fa                                      | CI      | Est. s.d. | Etop<br>( $\mu\text{M}$ ) | DZNep<br>( $\mu\text{M}$ ) |
| 0.02                                    | 1E+12   | 6E+14     | 0.002                     | 0.002                      |
| 0.05                                    | 2E+08   | 2E+10     | 0.006                     | 0.006                      |
| 0.1                                     | 3.2E+05 | 6.2E+06   | 0.020                     | 0.020                      |
| 0.15                                    | 5586    | 40440     | 0.040                     | 0.040                      |
| 0.2                                     | 260.4   | 908.6     | 0.067                     | 0.067                      |
| 0.25                                    | 20.85   | 38.69     | 0.104                     | 0.104                      |
| 0.3                                     | 2.449   | 2.339     | 0.152                     | 0.152                      |
| 0.35                                    | 0.512   | 0.190     | 0.215                     | 0.215                      |
| 0.4                                     | 0.280   | 0.058     | 0.297                     | 0.297                      |
| 0.45                                    | 0.268   | 0.050     | 0.405                     | 0.405                      |
| 0.5                                     | 0.291   | 0.050     | 0.549                     | 0.549                      |
| 0.55                                    | 0.323   | 0.052     | 0.744                     | 0.744                      |
| 0.6                                     | 0.360   | 0.054     | 1.014                     | 1.014                      |
| 0.65                                    | 0.404   | 0.059     | 1.400                     | 1.400                      |
| 0.7                                     | 0.456   | 0.065     | 1.978                     | 1.978                      |
| 0.75                                    | 0.521   | 0.077     | 2.893                     | 2.893                      |
| 0.8                                     | 0.608   | 0.096     | 4.470                     | 4.470                      |
| 0.85                                    | 0.732   | 0.131     | 7.571                     | 7.571                      |
| 0.9                                     | 0.937   | 0.202     | 15.24                     | 15.24                      |
| 0.95                                    | 1.396   | 0.400     | 47.20                     | 47.20                      |
| 0.99                                    | 3.370   | 1.587     | 573.2                     | 573.2                      |

| SW1573 DZNep + Etoposide<br>CI Simulations |       |           |                           |                            |
|--------------------------------------------|-------|-----------|---------------------------|----------------------------|
| Fa                                         | CI    | Est. s.d. | Etop<br>( $\mu\text{M}$ ) | DZNep<br>( $\mu\text{M}$ ) |
| 0.02                                       | 103.7 | 187.1     | 0.003                     | 0.003                      |
| 0.05                                       | 11.34 | 11.85     | 0.012                     | 0.012                      |
| 0.1                                        | 3.154 | 2.540     | 0.036                     | 0.036                      |
| 0.15                                       | 1.996 | 1.617     | 0.069                     | 0.069                      |
| 0.2                                        | 1.607 | 1.244     | 0.114                     | 0.114                      |
| 0.25                                       | 1.412 | 1.012     | 0.171                     | 0.171                      |
| 0.3                                        | 1.287 | 0.845     | 0.244                     | 0.244                      |
| 0.35                                       | 1.196 | 0.717     | 0.337                     | 0.337                      |
| 0.4                                        | 1.122 | 0.614     | 0.456                     | 0.456                      |
| 0.45                                       | 1.058 | 0.530     | 0.610                     | 0.610                      |
| 0.5                                        | 1.001 | 0.461     | 0.810                     | 0.810                      |
| 0.55                                       | 0.948 | 0.405     | 1.077                     | 1.077                      |
| 0.6                                        | 0.898 | 0.360     | 1.439                     | 1.439                      |
| 0.65                                       | 0.849 | 0.326     | 1.948                     | 1.948                      |
| 0.7                                        | 0.799 | 0.304     | 2.693                     | 2.693                      |
| 0.75                                       | 0.748 | 0.294     | 3.845                     | 3.845                      |
| 0.8                                        | 0.694 | 0.296     | 5.781                     | 5.781                      |
| 0.85                                       | 0.634 | 0.311     | 9.471                     | 9.471                      |
| 0.9                                        | 0.562 | 0.339     | 18.24                     | 18.24                      |
| 0.95                                       | 0.463 | 0.384     | 52.62                     | 52.62                      |
| 0.99                                       | 0.301 | 0.450     | 546.2                     | 546.2                      |

| H460 DZNep + Etoposide<br>CI Simulations |       |           |                           |                            |
|------------------------------------------|-------|-----------|---------------------------|----------------------------|
| Fa                                       | CI    | Est. s.d. | Etop<br>( $\mu\text{M}$ ) | DZNep<br>( $\mu\text{M}$ ) |
| 0.02                                     | 19.85 | 45.27     | 0.001                     | 0.001                      |
| 0.05                                     | 10.29 | 17.48     | 0.004                     | 0.004                      |
| 0.1                                      | 6.175 | 8.073     | 0.014                     | 0.014                      |
| 0.15                                     | 4.510 | 4.924     | 0.030                     | 0.030                      |
| 0.2                                      | 3.562 | 3.355     | 0.055                     | 0.055                      |
| 0.25                                     | 2.932 | 2.422     | 0.090                     | 0.090                      |
| 0.3                                      | 2.474 | 1.807     | 0.139                     | 0.139                      |
| 0.35                                     | 2.121 | 1.376     | 0.206                     | 0.206                      |
| 0.4                                      | 1.837 | 1.061     | 0.297                     | 0.297                      |
| 0.45                                     | 1.600 | 0.824     | 0.422                     | 0.422                      |
| 0.5                                      | 1.398 | 0.643     | 0.596                     | 0.596                      |
| 0.55                                     | 1.221 | 0.504     | 0.842                     | 0.842                      |
| 0.6                                      | 1.064 | 0.400     | 1.197                     | 1.197                      |
| 0.65                                     | 0.921 | 0.326     | 1.728                     | 1.728                      |
| 0.7                                      | 0.790 | 0.276     | 2.559                     | 2.559                      |
| 0.75                                     | 0.667 | 0.246     | 3.943                     | 3.943                      |
| 0.8                                      | 0.550 | 0.230     | 6.467                     | 6.467                      |
| 0.85                                     | 0.435 | 0.221     | 11.77                     | 11.77                      |
| 0.9                                      | 0.319 | 0.209     | 26.08                     | 26.08                      |
| 0.95                                     | 0.193 | 0.181     | 94.31                     | 94.31                      |
| 0.99                                     | 0.064 | 0.112     | 1612                      | 1612                       |

| H23 GSK126 + Etoposide<br>CI Simulations |       |           |                           |                             |
|------------------------------------------|-------|-----------|---------------------------|-----------------------------|
| Fa                                       | CI    | Est. s.d. | Etop<br>( $\mu\text{M}$ ) | GSK126<br>( $\mu\text{M}$ ) |
| 0.02                                     | 0.743 | 0.307     | 0.024                     | 0.024                       |
| 0.05                                     | 0.813 | 0.254     | 0.073                     | 0.073                       |
| 0.1                                      | 0.895 | 0.217     | 0.175                     | 0.175                       |
| 0.15                                     | 0.958 | 0.197     | 0.302                     | 0.302                       |
| 0.2                                      | 1.011 | 0.187     | 0.456                     | 0.456                       |
| 0.25                                     | 1.060 | 0.183     | 0.640                     | 0.640                       |
| 0.3                                      | 1.105 | 0.185     | 0.861                     | 0.861                       |
| 0.35                                     | 1.149 | 0.192     | 1.126                     | 1.126                       |
| 0.4                                      | 1.193 | 0.204     | 1.449                     | 1.449                       |
| 0.45                                     | 1.237 | 0.219     | 1.844                     | 1.844                       |
| 0.5                                      | 1.282 | 0.240     | 2.337                     | 2.337                       |
| 0.55                                     | 1.329 | 0.265     | 2.960                     | 2.960                       |
| 0.6                                      | 1.380 | 0.295     | 3.768                     | 3.768                       |
| 0.65                                     | 1.435 | 0.331     | 4.847                     | 4.847                       |
| 0.7                                      | 1.498 | 0.375     | 6.343                     | 6.343                       |
| 0.75                                     | 1.570 | 0.430     | 8.530                     | 8.530                       |
| 0.8                                      | 1.658 | 0.502     | 11.97                     | 11.97                       |
| 0.85                                     | 1.772 | 0.602     | 18.05                     | 18.05                       |
| 0.9                                      | 1.937 | 0.758     | 31.14                     | 31.14                       |
| 0.95                                     | 2.240 | 1.076     | 75.14                     | 75.14                       |
| 0.99                                     | 3.101 | 2.159     | 525.8                     | 525.8                       |

| SW1573 GSK126 + Etoposide<br>CI Simulations |       |           |                           |                             |
|---------------------------------------------|-------|-----------|---------------------------|-----------------------------|
| Fa                                          | CI    | Est. s.d. | Etop<br>( $\mu\text{M}$ ) | GSK126<br>( $\mu\text{M}$ ) |
| 0.02                                        | 55.27 | 406.2     | 0.006                     | 0.006                       |
| 0.05                                        | 21.45 | 103.9     | 0.020                     | 0.020                       |
| 0.1                                         | 10.73 | 35.36     | 0.048                     | 0.048                       |
| 0.15                                        | 7.059 | 18.05     | 0.084                     | 0.084                       |
| 0.2                                         | 5.164 | 10.83     | 0.128                     | 0.128                       |
| 0.25                                        | 3.993 | 7.080     | 0.180                     | 0.180                       |
| 0.3                                         | 3.192 | 4.861     | 0.244                     | 0.244                       |
| 0.35                                        | 2.605 | 3.439     | 0.320                     | 0.320                       |
| 0.4                                         | 2.154 | 2.477     | 0.414                     | 0.414                       |
| 0.45                                        | 1.796 | 1.799     | 0.529                     | 0.529                       |
| 0.5                                         | 1.503 | 1.308     | 0.674                     | 0.674                       |
| 0.55                                        | 1.258 | 0.947     | 0.857                     | 0.857                       |
| 0.6                                         | 1.049 | 0.680     | 1.096                     | 1.096                       |
| 0.65                                        | 0.868 | 0.483     | 1.416                     | 1.416                       |
| 0.7                                         | 0.709 | 0.343     | 1.863                     | 1.863                       |
| 0.75                                        | 0.567 | 0.252     | 2.519                     | 2.519                       |
| 0.8                                         | 0.440 | 0.201     | 3.559                     | 3.559                       |
| 0.85                                        | 0.323 | 0.179     | 5.407                     | 5.407                       |
| 0.9                                         | 0.214 | 0.165     | 9.423                     | 9.423                       |
| 0.95                                        | 0.110 | 0.142     | 23.11                     | 23.11                       |
| 0.99                                        | 0.026 | 0.087     | 167.7                     | 167.7                       |

| H460 GSK126 + Etoposide<br>CI Simulations |       |           |                           |                             |
|-------------------------------------------|-------|-----------|---------------------------|-----------------------------|
| Fa                                        | CI    | Est. s.d. | Etop<br>( $\mu\text{M}$ ) | GSK126<br>( $\mu\text{M}$ ) |
| 0.02                                      | 76.45 | 168.7     | 0.003                     | 0.003                       |
| 0.05                                      | 30.72 | 49.90     | 0.011                     | 0.011                       |
| 0.1                                       | 14.97 | 18.65     | 0.033                     | 0.033                       |
| 0.15                                      | 9.593 | 9.982     | 0.065                     | 0.065                       |
| 0.2                                       | 6.861 | 6.168     | 0.107                     | 0.107                       |
| 0.25                                      | 5.202 | 4.109     | 0.161                     | 0.161                       |
| 0.3                                       | 4.085 | 2.862     | 0.230                     | 0.230                       |
| 0.35                                      | 3.280 | 2.049     | 0.319                     | 0.319                       |
| 0.4                                       | 2.671 | 1.492     | 0.433                     | 0.433                       |
| 0.45                                      | 2.193 | 1.099     | 0.580                     | 0.580                       |
| 0.5                                       | 1.808 | 0.815     | 0.773                     | 0.773                       |
| 0.55                                      | 1.491 | 0.608     | 1.029                     | 1.029                       |
| 0.6                                       | 1.224 | 0.459     | 1.379                     | 1.379                       |
| 0.65                                      | 0.997 | 0.353     | 1.872                     | 1.872                       |
| 0.7                                       | 0.801 | 0.281     | 2.593                     | 2.593                       |
| 0.75                                      | 0.629 | 0.231     | 3.714                     | 3.714                       |
| 0.8                                       | 0.477 | 0.197     | 5.603                     | 5.603                       |
| 0.85                                      | 0.342 | 0.170     | 9.217                     | 9.217                       |
| 0.9                                       | 0.219 | 0.142     | 17.85                     | 17.85                       |
| 0.95                                      | 0.107 | 0.116     | 51.94                     | 51.94                       |
| 0.99                                      | 0.023 | 0.223     | 549.5                     | 549.5                       |

# Supplementary Table 3 Continued

| HCC15 DZNep + Etoposide<br>CI Simulations |       |           |                           |                            |
|-------------------------------------------|-------|-----------|---------------------------|----------------------------|
| Fa                                        | CI    | Est. s.d. | Etop<br>( $\mu\text{M}$ ) | DZNep<br>( $\mu\text{M}$ ) |
| 0.02                                      | 164.6 | 156.3     | 0.002                     | 0.002                      |
| 0.05                                      | 14.29 | 9.971     | 0.009                     | 0.009                      |
| 0.1                                       | 2.199 | 1.132     | 0.029                     | 0.029                      |
| 0.15                                      | 0.781 | 0.324     | 0.062                     | 0.062                      |
| 0.2                                       | 0.423 | 0.152     | 0.111                     | 0.111                      |
| 0.25                                      | 0.298 | 0.099     | 0.177                     | 0.177                      |
| 0.3                                       | 0.248 | 0.077     | 0.268                     | 0.268                      |
| 0.35                                      | 0.227 | 0.067     | 0.389                     | 0.389                      |
| 0.4                                       | 0.218 | 0.061     | 0.553                     | 0.553                      |
| 0.45                                      | 0.216 | 0.059     | 0.773                     | 0.773                      |
| 0.5                                       | 0.217 | 0.059     | 1.074                     | 1.074                      |
| 0.55                                      | 0.220 | 0.060     | 1.493                     | 1.493                      |
| 0.6                                       | 0.225 | 0.064     | 2.089                     | 2.089                      |
| 0.65                                      | 0.231 | 0.070     | 2.966                     | 2.966                      |
| 0.7                                       | 0.238 | 0.079     | 4.313                     | 4.313                      |
| 0.75                                      | 0.246 | 0.090     | 6.514                     | 6.514                      |
| 0.8                                       | 0.257 | 0.106     | 10.44                     | 10.44                      |
| 0.85                                      | 0.270 | 0.128     | 18.49                     | 18.49                      |
| 0.9                                       | 0.288 | 0.164     | 39.49                     | 39.49                      |
| 0.95                                      | 0.321 | 0.235     | 134.5                     | 134.5                      |
| 0.99                                      | 0.406 | 0.469     | 2017                      | 2017                       |

| HCC15 GSK + Etoposide<br>CI Simulations |       |           |                           |                             |
|-----------------------------------------|-------|-----------|---------------------------|-----------------------------|
| Fa                                      | CI    | Est. s.d. | Etop<br>( $\mu\text{M}$ ) | GSK126<br>( $\mu\text{M}$ ) |
| 0.02                                    | 401.6 | 1637      | 0.012                     | 0.012                       |
| 0.05                                    | 3.539 | 3.885     | 0.044                     | 0.044                       |
| 0.1                                     | 0.698 | 0.428     | 0.122                     | 0.122                       |
| 0.15                                    | 0.606 | 0.319     | 0.229                     | 0.229                       |
| 0.2                                     | 0.573 | 0.264     | 0.367                     | 0.367                       |
| 0.25                                    | 0.549 | 0.228     | 0.542                     | 0.542                       |
| 0.3                                     | 0.530 | 0.202     | 0.763                     | 0.763                       |
| 0.35                                    | 0.513 | 0.185     | 1.039                     | 1.039                       |
| 0.4                                     | 0.498 | 0.174     | 1.388                     | 1.388                       |
| 0.45                                    | 0.484 | 0.168     | 1.833                     | 1.833                       |
| 0.5                                     | 0.471 | 0.166     | 2.406                     | 2.406                       |
| 0.55                                    | 0.458 | 0.167     | 3.159                     | 3.159                       |
| 0.6                                     | 0.445 | 0.172     | 4.170                     | 4.170                       |
| 0.65                                    | 0.431 | 0.179     | 5.571                     | 5.571                       |
| 0.7                                     | 0.418 | 0.188     | 7.592                     | 7.592                       |
| 0.75                                    | 0.403 | 0.200     | 10.68                     | 10.68                       |
| 0.8                                     | 0.387 | 0.215     | 15.77                     | 15.77                       |
| 0.85                                    | 0.369 | 0.234     | 25.29                     | 25.29                       |
| 0.9                                     | 0.346 | 0.259     | 47.37                     | 47.37                       |
| 0.95                                    | 0.311 | 0.297     | 130.5                     | 130.5                       |
| 0.99                                    | 0.247 | 0.369     | 1224                      | 1224                        |

| A549 DZNep + Etoposide<br>CI Simulations |        |           |                           |                            |
|------------------------------------------|--------|-----------|---------------------------|----------------------------|
| Fa                                       | CI     | Est. s.d. | Etop<br>( $\mu\text{M}$ ) | DZNep<br>( $\mu\text{M}$ ) |
| 0.02                                     | 159.85 | 561.11    | 8E-05                     | 8E-05                      |
| 0.05                                     | 8.957  | 16.333    | 0.001                     | 0.001                      |
| 0.1                                      | 1.085  | 1.005     | 0.005                     | 0.005                      |
| 0.15                                     | 0.428  | 0.240     | 0.014                     | 0.014                      |
| 0.2                                      | 0.303  | 0.142     | 0.031                     | 0.031                      |
| 0.25                                     | 0.274  | 0.117     | 0.062                     | 0.062                      |
| 0.3                                      | 0.271  | 0.103     | 0.111                     | 0.111                      |
| 0.35                                     | 0.277  | 0.093     | 0.191                     | 0.191                      |
| 0.4                                      | 0.287  | 0.086     | 0.316                     | 0.316                      |
| 0.45                                     | 0.298  | 0.080     | 0.513                     | 0.513                      |
| 0.5                                      | 0.311  | 0.078     | 0.823                     | 0.823                      |
| 0.55                                     | 0.324  | 0.079     | 1.321                     | 1.321                      |
| 0.6                                      | 0.339  | 0.084     | 2.142                     | 2.142                      |
| 0.65                                     | 0.355  | 0.096     | 3.546                     | 3.546                      |
| 0.7                                      | 0.373  | 0.114     | 6.077                     | 6.077                      |
| 0.75                                     | 0.394  | 0.140     | 11.00                     | 11.00                      |
| 0.8                                      | 0.420  | 0.176     | 21.68                     | 21.68                      |
| 0.85                                     | 0.454  | 0.231     | 49.32                     | 49.32                      |
| 0.9                                      | 0.502  | 0.320     | 147.0                     | 147.0                      |
| 0.95                                     | 0.592  | 0.512     | 857.0                     | 857.0                      |
| 0.99                                     | 0.851  | 1.245     | 42135                     | 42135                      |

| A549 GSK126 + Etoposide<br>CI Simulations |       |           |                           |                             |
|-------------------------------------------|-------|-----------|---------------------------|-----------------------------|
| Fa                                        | CI    | Est. s.d. | Etop<br>( $\mu\text{M}$ ) | GSK126<br>( $\mu\text{M}$ ) |
| 0.02                                      | 1.072 | 1.193     | 0.001                     | 0.001                       |
| 0.05                                      | 0.902 | 0.747     | 0.004                     | 0.004                       |
| 0.1                                       | 0.787 | 0.495     | 0.019                     | 0.019                       |
| 0.15                                      | 0.724 | 0.372     | 0.047                     | 0.047                       |
| 0.2                                       | 0.679 | 0.295     | 0.093                     | 0.093                       |
| 0.25                                      | 0.645 | 0.240     | 0.163                     | 0.163                       |
| 0.3                                       | 0.616 | 0.198     | 0.266                     | 0.266                       |
| 0.35                                      | 0.591 | 0.166     | 0.417                     | 0.417                       |
| 0.4                                       | 0.568 | 0.141     | 0.633                     | 0.633                       |
| 0.45                                      | 0.548 | 0.123     | 0.945                     | 0.945                       |
| 0.5                                       | 0.528 | 0.111     | 1.399                     | 1.399                       |
| 0.55                                      | 0.509 | 0.105     | 2.072                     | 2.072                       |
| 0.6                                       | 0.491 | 0.105     | 3.094                     | 3.094                       |
| 0.65                                      | 0.472 | 0.110     | 4.699                     | 4.699                       |
| 0.7                                       | 0.453 | 0.119     | 7.345                     | 7.345                       |
| 0.75                                      | 0.433 | 0.132     | 12.01                     | 12.01                       |
| 0.8                                       | 0.412 | 0.149     | 21.09                     | 21.09                       |
| 0.85                                      | 0.387 | 0.168     | 41.71                     | 41.71                       |
| 0.9                                       | 0.356 | 0.193     | 103.1                     | 103.1                       |
| 0.95                                      | 0.313 | 0.228     | 445.2                     | 445.2                       |
| 0.99                                      | 0.238 | 0.286     | 11262                     | 11262                       |

| H157 DZNep + Etoposide<br>CI Simulations |       |           |                           |                            |
|------------------------------------------|-------|-----------|---------------------------|----------------------------|
| Fa                                       | CI    | Est. s.d. | Etop<br>( $\mu\text{M}$ ) | DZNep<br>( $\mu\text{M}$ ) |
| 0.02                                     | 4.250 | 4.229     | 0.047                     | 0.047                      |
| 0.05                                     | 1.211 | 0.617     | 0.116                     | 0.116                      |
| 0.1                                      | 0.642 | 0.200     | 0.240                     | 0.240                      |
| 0.15                                     | 0.523 | 0.144     | 0.375                     | 0.375                      |
| 0.2                                      | 0.483 | 0.124     | 0.525                     | 0.525                      |
| 0.25                                     | 0.467 | 0.112     | 0.694                     | 0.694                      |
| 0.3                                      | 0.461 | 0.104     | 0.885                     | 0.885                      |
| 0.35                                     | 0.460 | 0.098     | 1.104                     | 1.104                      |
| 0.4                                      | 0.461 | 0.094     | 1.357                     | 1.357                      |
| 0.45                                     | 0.465 | 0.091     | 1.655                     | 1.655                      |
| 0.5                                      | 0.469 | 0.090     | 2.009                     | 2.009                      |
| 0.55                                     | 0.474 | 0.089     | 2.440                     | 2.440                      |
| 0.6                                      | 0.480 | 0.091     | 2.974                     | 2.974                      |
| 0.65                                     | 0.487 | 0.094     | 3.657                     | 3.657                      |
| 0.7                                      | 0.494 | 0.099     | 4.560                     | 4.560                      |
| 0.75                                     | 0.503 | 0.107     | 5.816                     | 5.816                      |
| 0.8                                      | 0.514 | 0.119     | 7.682                     | 7.682                      |
| 0.85                                     | 0.527 | 0.136     | 10.76                     | 10.76                      |
| 0.9                                      | 0.546 | 0.163     | 16.83                     | 16.83                      |
| 0.95                                     | 0.578 | 0.215     | 34.69                     | 34.69                      |
| 0.99                                     | 0.655 | 0.367     | 171.3                     | 171.3                      |

| H157 GSK126 + Etoposide<br>CI Simulations |       |           |                           |                             |
|-------------------------------------------|-------|-----------|---------------------------|-----------------------------|
| Fa                                        | CI    | Est. s.d. | Etop<br>( $\mu\text{M}$ ) | GSK126<br>( $\mu\text{M}$ ) |
| 0.02                                      | 3.010 | 1.435     | 0.354                     | 0.354                       |
| 0.05                                      | 2.040 | 0.806     | 0.565                     | 0.565                       |
| 0.1                                       | 1.502 | 0.505     | 0.816                     | 0.816                       |
| 0.15                                      | 1.243 | 0.377     | 1.026                     | 1.026                       |
| 0.2                                       | 1.078 | 0.304     | 1.219                     | 1.219                       |
| 0.25                                      | 0.959 | 0.255     | 1.405                     | 1.405                       |
| 0.3                                       | 0.865 | 0.219     | 1.590                     | 1.590                       |
| 0.35                                      | 0.788 | 0.193     | 1.780                     | 1.780                       |
| 0.4                                       | 0.723 | 0.172     | 1.978                     | 1.978                       |
| 0.45                                      | 0.665 | 0.155     | 2.189                     | 2.189                       |
| 0.5                                       | 0.613 | 0.141     | 2.417                     | 2.417                       |
| 0.55                                      | 0.565 | 0.129     | 2.668                     | 2.668                       |
| 0.6                                       | 0.519 | 0.119     | 2.952                     | 2.952                       |
| 0.65                                      | 0.476 | 0.110     | 3.281                     | 3.281                       |
| 0.7                                       | 0.434 | 0.103     | 3.672                     | 3.672                       |
| 0.75                                      | 0.392 | 0.096     | 4.158                     | 4.158                       |
| 0.8                                       | 0.349 | 0.090     | 4.792                     | 4.792                       |
| 0.85                                      | 0.303 | 0.084     | 5.692                     | 5.692                       |
| 0.9                                       | 0.251 | 0.077     | 7.153                     | 7.153                       |
| 0.95                                      | 0.185 | 0.068     | 10.35                     | 10.35                       |
| 0.99                                      | 0.095 | 0.049     | 23.38                     | 23.38                       |

## Supplementary Table 3 Continued

| PC9 DZNep + Etoposide CI Simulations  |       |           |                           |                             |
|---------------------------------------|-------|-----------|---------------------------|-----------------------------|
| Fa                                    | CI    | Est. s.d. | Etop<br>( $\mu\text{M}$ ) | DZNep<br>( $\mu\text{M}$ )  |
| 0.02                                  | 28.21 | 24.02     | 0.040                     | 0.040                       |
| 0.05                                  | 3.420 | 2.107     | 0.087                     | 0.087                       |
| 0.1                                   | 0.715 | 0.328     | 0.161                     | 0.161                       |
| 0.15                                  | 0.325 | 0.129     | 0.237                     | 0.237                       |
| 0.2                                   | 0.219 | 0.083     | 0.316                     | 0.316                       |
| 0.25                                  | 0.182 | 0.069     | 0.401                     | 0.401                       |
| 0.3                                   | 0.171 | 0.066     | 0.495                     | 0.495                       |
| 0.35                                  | 0.170 | 0.066     | 0.598                     | 0.598                       |
| 0.4                                   | 0.175 | 0.068     | 0.714                     | 0.714                       |
| 0.45                                  | 0.183 | 0.071     | 0.846                     | 0.846                       |
| 0.5                                   | 0.192 | 0.075     | 0.999                     | 0.999                       |
| 0.55                                  | 0.204 | 0.079     | 1.180                     | 1.180                       |
| 0.6                                   | 0.217 | 0.085     | 1.399                     | 1.399                       |
| 0.65                                  | 0.233 | 0.092     | 1.670                     | 1.670                       |
| 0.7                                   | 0.251 | 0.101     | 2.019                     | 2.019                       |
| 0.75                                  | 0.273 | 0.112     | 2.487                     | 2.487                       |
| 0.8                                   | 0.301 | 0.128     | 3.158                     | 3.158                       |
| 0.85                                  | 0.338 | 0.150     | 4.217                     | 4.217                       |
| 0.9                                   | 0.396 | 0.189     | 6.190                     | 6.190                       |
| 0.95                                  | 0.510 | 0.277     | 11.51                     | 11.51                       |
| 0.99                                  | 0.892 | 0.649     | 45.30                     | 45.302                      |
|                                       |       |           |                           |                             |
|                                       |       |           |                           |                             |
|                                       |       |           |                           |                             |
| PC9 GSK126 + Etoposide CI Simulations |       |           |                           |                             |
| Fa                                    | CI    | Est. s.d. | Etop<br>( $\mu\text{M}$ ) | GSK126<br>( $\mu\text{M}$ ) |
| 0.02                                  | 38.43 | 44.77     | 0.035                     | 0.035                       |
| 0.05                                  | 5.103 | 3.771     | 0.093                     | 0.093                       |
| 0.1                                   | 1.124 | 0.534     | 0.202                     | 0.202                       |
| 0.15                                  | 0.519 | 0.194     | 0.327                     | 0.327                       |
| 0.2                                   | 0.352 | 0.123     | 0.470                     | 0.470                       |
| 0.25                                  | 0.300 | 0.106     | 0.633                     | 0.633                       |
| 0.3                                   | 0.290 | 0.104     | 0.822                     | 0.822                       |
| 0.35                                  | 0.300 | 0.110     | 1.043                     | 1.043                       |
| 0.4                                   | 0.320 | 0.119     | 1.302                     | 1.302                       |
| 0.45                                  | 0.348 | 0.131     | 1.610                     | 1.610                       |
| 0.5                                   | 0.382 | 0.146     | 1.984                     | 1.984                       |
| 0.55                                  | 0.422 | 0.164     | 2.444                     | 2.444                       |
| 0.6                                   | 0.470 | 0.187     | 3.024                     | 3.024                       |
| 0.65                                  | 0.526 | 0.215     | 3.775                     | 3.775                       |
| 0.7                                   | 0.595 | 0.252     | 4.786                     | 4.786                       |
| 0.75                                  | 0.682 | 0.302     | 6.214                     | 6.214                       |
| 0.8                                   | 0.798 | 0.373     | 8.380                     | 8.380                       |
| 0.85                                  | 0.966 | 0.485     | 12.04                     | 12.04                       |
| 0.9                                   | 1.244 | 0.691     | 19.47                     | 19.47                       |
| 0.95                                  | 1.874 | 1.222     | 42.32                     | 42.32                       |
| 0.99                                  | 4.632 | 4.204     | 235.3                     | 235.3                       |



Supplementary Table 4: Mutational Data of NSCLC Cell Lines Used in this Study

| Cell Line | Gender | Age | Ethnicity    | Subtype   | Stage | Smoke<br>(pack/yr) | Biopsy     | PIK3CA    | Kras | Nras | p53             | SMARCA4  | EGFR         | CDKN2A     | LKB1     |
|-----------|--------|-----|--------------|-----------|-------|--------------------|------------|-----------|------|------|-----------------|----------|--------------|------------|----------|
| H1975     | F      | N/A | N/A          | AdC       | N/A   | non-smoker         | primary    | G118D     | WT   | WT   | R273H           | WT       | T790M, L858R | E69*       | Q37* het |
| H2030     | M      | N/A | N/A          | AdC       | N/A   | unknown            | metastasis | WT        | G12C | WT   | G262V           | deletion | WT           | WT         | E317*    |
| HCC4006   | M      | N/A | Caucasian    | AdC       | N/A   | non-smoker         | N/A        | WT        | WT   | WT   | N/A             | N/A      | L747_E749del | N/A        | WT       |
| A549      | M      | 58  | Caucasian    | AdC       | N/A   | unknown            | primary    | WT        | G12S | WT   | WT              | Q729*    | WT           | deletion   | Q37*     |
| HCC2450   | M      | 52  | Caucasian    | SCC       | IIIB  | unknown            | primary    | H1047R    | N/A  | N/A  | deletion        | N/A      | N/A          | N/A        | N/A      |
| PC9       | M      | 45  | East Asian   | AdC       | N/A   | unknown            | N/A        | WT        | WT   | WT   | N/A             | N/A      | E746_A750del | G67V       | WT       |
| Calu1     | M      | 47  | Caucasian    | EpiC      | III   | unknown            | pleura     | WT        | G12C | WT   | WT              | WT       | WT           | WT         | WT       |
| H1650     | M      | 27  | Caucasian    | AdC (BAC) | IIIB  | 10                 | pleura     | WT        | WT   | WT   | deletion        | WT       | E746X        | deletion   | WT       |
| H522      | M      | 60  | Caucasian    | AdC       | II    | 60                 | primary    | WT        | WT   | WT   | P191*           | P270*    | WT           | WT         | WT       |
| H2126     | M      | 65  | Caucasian    | LC        | IIIB  | non-smoker         | pleura     | WT        | WT   | WT   | E62*            | W764R    | WT           | deletion   | deletion |
| H157      | M      | 59  | Caucasian    | SCC       | IIIB  | 50                 | metastasis | WT        | G12R | WT   | E298*           | T58*     | WT           | E69*       | deletion |
| H1299     | M      | 43  | Caucasian    | LC        | IIIA  | 50                 | lymph node | WT        | WT   | Q61K | deletion        | Y560*    | WT           | hypermeth  | WT       |
| HCC15     | M      | 47  | Afr-American | SCC       | N/A   | unknown            | primary    | WT        | WT   | mut  | mut             | M272*    | WT           | mut/hyperm | deletion |
| HCC827    | F      | 39  | Caucasian    | AdC       | N/A   | 4                  | N/A        | WT        | WT   | WT   | V218del         | WT       | E746_A750del | N/A        | WT       |
| H322      | M      | 52  | Caucasian    | AdC (BAC) | IV    | 60                 | lymph node | WT        | WT   | WT   | N/A             | N/A      | WT           | deletion   | WT       |
| H2009     | F      | 68  | Caucasian    | AdC       | IV    | 30                 | lymph node | E711D     | G12A | WT   | R273L           | WT       | WT           | WT         | WT       |
| Sw1573    | F      | 44  | Caucasian    | AdC       | N/A   | unknown            | primary    | K111E     | G12C | WT   | WT              | WT       | WT           | deletion   | WT       |
| Calu6     | F      | 61  | Caucasian    | AdC (Ana) | N/A   | unknown            | primary    | N/A       | Q61K | WT   | R196*           | WT       | WT           | WT         | WT       |
| H441      | M      | 33  | N/A          | AdC (pap) | IIIA  | non-smoker         | pleura     | WT        | G12V | WT   | R158L           | WT       | WT           | hypermeth  | WT       |
| HCC95     | M      | 64  | Caucasian    | SCC       | IV    | unknown            | pleura     | Amplified | WT   | WT   | WT              | WT       | WT           | mut/hyperm | WT       |
| H520      | M      | N/A | N/A          | SCC       | N/A   | non-smoker         | primary    | WT        | WT   | WT   | W146*           | WT       | WT           | G45*       | WT       |
| H460      | M      | N/A | N/A          | LC        | N/A   | non-smoker         | primary    | E545K     | Q61H | WT   | mut             | WT       | WT           | deletion   | Q37*     |
| Calu3     | M      | 25  | Caucasian    | AdC       | N/A   | unknown            | pleura     | Amplified | WT   | WT   | M237I           | WT       | WT           | hypermeth  | WT       |
| H2122     | F      | 46  | Caucasian    | AdC       | IV    | 30                 | pleura     | WT        | G12C | WT   | C176F,<br>Q16L, | WT       | WT           | deletion   | P281*    |
| H23       | M      | 51  | Afr-American | AdC       | N/A   | 40                 | primary    | WT        | G12C | WT   | M246I           | K1533N   | WT           | hypermeth  | W322*    |
| H3255     | F      | 47  | Caucasian    | AdC       | IIIB  | non-smoker         | N/A        | Amplified | G12C | WT   | N/A             | N/A      | L858R        | N/A        | N/A      |
| Cell Line | Gender | Age | Ethnicity    | Subtype   | Stage | Smoke<br>(pack/yr) | Biopsy     | PIK3CA    | Kras | Nras | p53             | SMARCA4  | EGFR         | CDKN2A     | LKB1     |

**Supplementary Table 5: Shared differentially expressed genes in *EGFR* and *BRG1* mutant NSCLC cell lines**

| Probe       | Symbol           | Description                                | p-value | log2 fold change for Brg1mut - WT | log2 fold change for EGFRmut - WT |
|-------------|------------------|--------------------------------------------|---------|-----------------------------------|-----------------------------------|
| 201983_s_at | <b>EGFR</b>      | epidermal growth factor receptor           | 0.014   | 2.178                             | 2.232                             |
| 210986_s_at | <b>TPM1</b>      | tropomyosin 1 (alpha)                      | 0.007   | 1.525                             | 1.743                             |
| 218368_s_at | <b>TNFRSF12A</b> | tumor necrosis factor receptor, 12A        | 0.004   | 1.172                             | 1.173                             |
| 205130_at   | <b>MOK</b>       | MOK protein kinase                         | 0.013   | 0.928                             | 0.891                             |
| 217785_s_at | <b>YKT6</b>      | YKT6 v-SNARE homolog (S. cerevisiae)       | 0.01    | 0.913                             | 1.196                             |
| 219088_s_at | <b>ZNF576</b>    | zinc finger protein 576                    | 7E-04   | 0.907                             | 1.008                             |
| 202408_s_at | <b>PRPF31</b>    | PRP31 pre-mRNA processing factor 31        | 0.001   | 0.755                             | 0.974                             |
| 218261_at   | <b>AP1M2</b>     | adaptor-related protein complex 1, mu      | 0.013   | 0.748                             | 0.937                             |
| 202578_s_at | <b>DDX19A</b>    | DEAD (Asp-Glu-Ala-Asp) box 19A             | 0.002   | 0.716                             | 0.531                             |
| 201144_s_at | <b>EIF2S1</b>    | eukaryotic translation initiation factor 2 | 0.012   | 0.69                              | 0.79                              |
| 216299_s_at | <b>XRCC3</b>     | X-ray repair complementing defective       | 0.003   | 0.574                             | 0.572                             |
| 217784_at   | <b>YKT6</b>      | YKT6 v-SNARE homolog (S. cerevisiae)       | 0.002   | 0.531                             | 0.81                              |
| 1773_at     | <b>FNTB</b>      | farnesyltransferase, CAAX box, beta        | 0.003   | 0.514                             | 0.408                             |
| 218408_at   | <b>TIMM10</b>    | membrane 10 homolog (yeast)                | 0.004   | 0.475                             | 0.727                             |
| 221769_at   | <b>SPSB3</b>     | SOCS box containing 3                      | 0.008   | 0.471                             | 0.614                             |
| 202927_at   | <b>PIN1</b>      | peptidylprolyl cis/ NIMA-interacting 1     | 0.007   | 0.456                             | 0.451                             |
| 211289_x_at | <b>CDK11</b>     | cyclin dependent kinase 11                 | 0.006   | 0.438                             | 0.373                             |
| 218206_x_at | <b>SCAND1</b>    | SCAN domain containing 1                   | 0.005   | 0.396                             | 0.543                             |
| 214244_s_at | <b>ATP6V0E1</b>  | ATPase V0 subunit e1                       | 0.005   | 0.384                             | 0.481                             |
| 221907_at   | <b>TRMT61A</b>   | tRNA methyltransferase                     | 0.006   | 0.378                             | 0.522                             |
| 221650_s_at | <b>MED18</b>     | mediator complex subunit 18                | 0.008   | 0.251                             | 0.29                              |
